# Supplementary material for: Linearly descending viscosity for alkaline–surfactant–polymer flooding mobility modification in multilayer heterogeneous reservoirs
Source: Royal Society of Chemistry journal article supplement (doi:10.1039/c8ra00362a), 2018-01-01
Supplement: c8ra00362a1.pdf [file c8ra00362a1.pdf]

## Parameters of the models

Attached table 1 Air permeability of different layers of the heterogeneous models

| Model | layer | $\Phi$ (%) | $K_g$ ( $10^{-3} \mu\text{m}^2$ ) |
|-------|-------|------------|-----------------------------------|
| RI    | K1    | 23.73      | 586.6                             |
|       | K2    |            |                                   |
|       | K3    |            |                                   |
| RII   | K1    | 24.56      | 590.3                             |
|       | K2    |            |                                   |
|       | K3    |            |                                   |
| RIII  | K1    | 24.22      | 581.2                             |
|       | K2    |            |                                   |
|       | K3    |            |                                   |
| WI    | K1    | 24.87      | 805.5                             |
|       | K2    | 23.71      | 507.0                             |
|       | K3    | 22.11      | 287.5                             |
| WII   | K1    | 24.82      | 789.8                             |
|       | K2    | 24.47      | 510.3                             |
|       | K3    | 23.04      | 277.7                             |
| WIII  | K1    | 23.88      | 818.0                             |
|       | K2    | 23.09      | 525.1                             |
|       | K3    | 22.39      | 295.2                             |

## Added photos

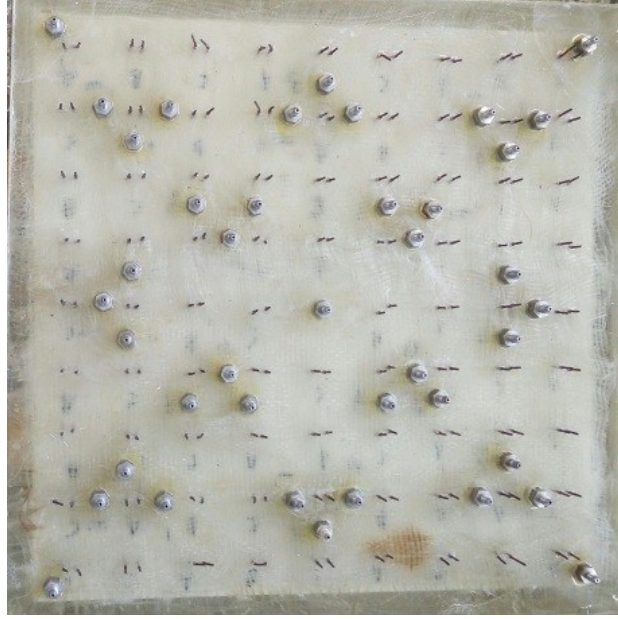

Attached fig.1 Planform of an heterogeneity core model

## The uncertainty calculation

Enhanced oil recovery can be calculated from the following formula:

$$\Delta R_e = \Delta V_{po} / V_{so} \quad (1)$$

It's worth noting that:

$$\Delta V_{po} = \sum_{i=1}^n v_{oi} \quad (2)$$

Besides,  $\Delta R_e$  has a function relationship with the injection volume ( $V_i$ ) of ASP slug according to the empirical formula:

$$\Delta R_e = 11.81 \ln(V_i / PV + 0.24) + 19.43 \quad (3)$$

And the temperature has an impact on the viscosity of Daqing oil, which possesses the following law when the temperature is between 43 and 50°C.

$$\mu = e^{1.0362 - 0.0086294T} \quad (4)$$

The relation of oil viscosity and the enhance oil recovery is as follows:

$$\Delta R_e = -0.0011\mu^2 - 0.2769\mu + 36.644 \quad (5)$$

Merge the formula (4) and (5), the relation of  $\Delta R_e$  and temperature is obtained:

$$\Delta R_e = -0.0011 \times e^{2.0724 - 0.0172588T} - 0.2769 \times e^{1.0362 - 0.0086294T} + 36.644 \quad (6)$$

The formula (1), (3) and (6) are independent respectively, the uncertainty of  $\Delta R_e$  can be calculated by the uncertainty propagation formula:

$$u(\Delta R_e) = \sqrt{\left(\frac{\partial f}{\partial \Delta V_{po}}\right)^2 u(\Delta V_{po}) + \left(\frac{\partial f}{\partial V_{so}}\right)^2 u(V_{so}) + \left(\frac{\partial f}{\partial V_i}\right)^2 u(V_i) + \left(\frac{\partial f}{\partial PV}\right)^2 u(PV) + \left(\frac{\partial f}{\partial T}\right)^2 u(T)} \quad (7)$$

The standard uncertainty of the parameters was as shown in the Attached table 2.

Attached table 2 Standard uncertainty of the parameters

| parameter | Uncertainty            |                          |                      |          |                       |                       |
|-----------|------------------------|--------------------------|----------------------|----------|-----------------------|-----------------------|
|           | Type-A<br>(statistics) | Type-B1<br>(measurement) | Type-B2 (instrument) |          | Combined<br>standard  |                       |
|           |                        |                          | relative             | standard |                       |                       |
| PV        | Intralayer             | 89.46 cm <sup>3</sup>    | --                   | 1.5%     | 34.64 cm <sup>3</sup> | 95.93 cm <sup>3</sup> |
|           | Interlayer             | 68.02 cm <sup>3</sup>    | --                   | 1.5%     | 34.49 cm <sup>3</sup> | 76.26 cm <sup>3</sup> |
| $V_i$     | Intralayer             | --                       | --                   | 1.5%     | 10.39 cm <sup>3</sup> | 10.39 cm <sup>3</sup> |
|           | Interlayer             | --                       | --                   | 1.5%     | 10.35 cm <sup>3</sup> | 10.35 cm <sup>3</sup> |
| $V_{so}$  | Intralayer             | 72.15 mL                 | 3.128 mL             | --       | 0.288 mL              | 72.22 mL              |
|           | Interlayer             | 49.70 mL                 | 3.128 mL             | --       | 0.288 mL              | 49.80 mL              |
|           | $v_{oi}$               | --                       | 0.125 mL             | --       | 0.0115mL              | 0.126mL               |
|           | T                      | --                       | --                   | --       | 1.0 °C                | 1.0 °C                |

Note: The relative uncertainty caused by the flux pump was 1.5% in flow, by the thermotank was 1°C in temperature. The uncertainty caused by the measurement when reading measuring cylinder was calculated based on basic theory of maximum error.

The uncertainty of  $\Delta V_{po}$  can be calculated by the uncertainty propagation formula:

$$u(\Delta V_{po}) = \sqrt{\sum_{i=1}^n (v_{oi})^2}$$

n=160 in intralayer heterogeneous models, and  $u(\Delta V_{po})=1.59\text{mL}$ ; n=120 in interlayer heterogeneous models, and  $u(\Delta V_{po})=1.38\text{mL}$ .

By calculation, the uncertainty of  $\Delta R_e=0.2901\%$  in intralayer heterogeneity models and 0.2309% in interlayer heterogeneity models. The  $\Delta R_e$  with uncertainty was as shown in Attached table 3.

Attached table 3  $\Delta R_e$  with uncertainty in core flooding experiments.

| model | $\Delta R_e/\%$ | Standard $u(\Delta R_e) / \%$ | $\Delta R_e$ with uncertainty /% |
|-------|-----------------|-------------------------------|----------------------------------|
| RI    | 28.25           | 0.2901                        | 28.25±0.29                       |
| RII   | 26.01           | 0.2901                        | 26.01±0.29                       |
| RIII  | 30.76           | 0.2901                        | 30.76±0.29                       |
| WI    | 23.17           | 0.2309                        | 23.17±0.23                       |
| WII   | 22.87           | 0.2309                        | 22.87±0.23                       |
| WIII  | 25.24           | 0.2309                        | 25.24±0.23                       |

#### Nomenclature

|                 |                                                                            |    |
|-----------------|----------------------------------------------------------------------------|----|
| $\Delta R_e$    | Enhanced oil recovery (incremental recovery by ASP flooding in this paper) | %  |
| $\Delta V_{po}$ | Total produced oil volume by ASP flooding                                  | mL |
| $V_{so}$        | Saturated oil volume                                                       | mL |
| $v_{oi}$        | Produced oil volume in sample i                                            | mL |
| $V_i$           | Injection volume of ASP slug                                               | mL |

|       |             |                 |
|-------|-------------|-----------------|
| PV    | Pore volume | cm <sup>3</sup> |
| $\mu$ | viscosity   | mPa.s           |
| T     | temperature | °C              |
| u     | uncertainty |                 |

During the measurement of viscosity, the factors affecting the test result containing temperature and the error caused by the viscometer. Thus, the relatively uncertainty of viscosity caused by the viscometer is 2.0%. The uncertainty of temperature caused by the thermostatic waterbath is 0.1°C. The relation of ASP viscosity and temperature under different concentration was shown in Attached fig.2.

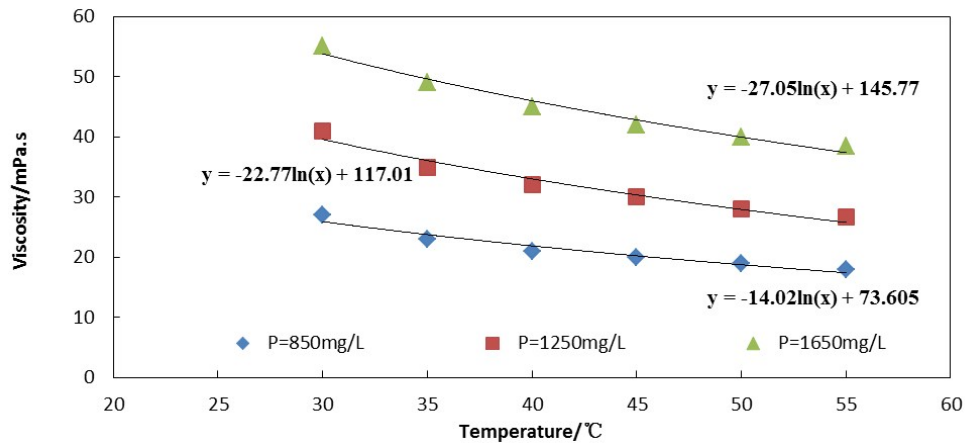

Attached fig.2 Viscosity of ASP solution as a function of temperature

The Combined relative standard uncertainty of viscosity can be calculated basing on the uncertainty propagation formula.

Attached table 4 Relative uncertainty of viscosity

| Polymer concentration/mg.L <sup>-1</sup> | Relative $u(\mu)$ /% |
|------------------------------------------|----------------------|
| 850                                      | 2.0012               |
| 1250                                     | 2.0032               |
| 1650                                     | 2.0045               |

Total slug size of injection fluid ( $S_{si}$ ) can be calculated by the following formula:

$$S_{si} = \Delta V_l / PV_m \quad (8)$$

$PV_m$  refers to the monolayer pore volume. And the monolayer produced liquid volume ( $\Delta V_l$ ) during the injection of ASP and polymer slug:

$$\Delta V_l = \sum_{i=1}^n v_{oi} \quad (9)$$

The uncertainty of  $\Delta V_l$  can be calculated by the uncertainty propagation formula:

$$u(\Delta V_l) = \sqrt{\sum_{i=1}^n (v_{oi})^2}$$

n=64 during the injection process of ASP and polymer slug in interlayer heterogeneous models, and  $u(\Delta V_l)=1.01\text{mL}$ .

In the same way with the calculation of  $u(\Delta R_e)$ ,  $u(Ssi)$  can be obtained by the following formula:

$$u(Ssi) = \sqrt{\left(\frac{\partial f}{\partial \Delta V_l}\right)^2 u(\Delta V_l)^2 + \left(\frac{\partial f}{\partial PV_m}\right)^2 u(PV_m)^2} \quad (10)$$

By calculation, the uncertainty of  $Ssi=0.0290\text{PV}$  in 800md layer,  $0.0137\text{PV}$  in 500md layer and  $0.0079\text{PV}$  in 300md layer.

The monolayer oil recovery by primary waterflooding ( $R_{ew}$ ) can be calculated from the following formula:

$$R_{ew} = \Delta V_{ow} / V_{so} \quad (11)$$

The uncertainty of oil recovery by primary waterflooding  $u(R_{ew})$ :

$$u(R_{ew}) = \sqrt{u_A^2(R_{ew}) + u_B^2(R_{ew})} \quad (12)$$

And:

$$u_B(R_{ew}) = \frac{R_{ew}}{\sqrt{\frac{\Delta V_{ow}^2}{u^2(\Delta V_{ow})} + \frac{V_{so}^2}{u^2(V_{so})}}} \quad (13)$$

The monolayer uncertainty of  $\Delta R_e$  can be obtained by the similar procedure with the method mentioned above, and the process won't be repeated here.

$$R_e = R_{ew} + \Delta R_e \quad (14)$$

As a result, the uncertainty of total recovery  $u(R_e)$ :

$$u(R_e) = (u^2(R_{ew}) + u^2(\Delta R_e))^{1/2} \quad (15)$$

The calculated results were as follows:

Attached table 5 Monolayer uncertainty of oil recovery by primary waterflooding and enhance oil recovery

| Layer     | $u(R_{ew})$ /% | Injection pattern | $u(\Delta R_e)$ /% | $u(R_e)$ /% |
|-----------|----------------|-------------------|--------------------|-------------|
| 800       | 2.1283         | Constant          | 0.2724             | 2.1457      |
|           |                | Ascending         | 0.2746             | 2.1459      |
|           |                | Descending        | 0.2602             | 2.1442      |
| 500       | 1.5550         | Constant          | 0.3202             | 1.5876      |
|           |                | Ascending         | 0.3185             | 1.5873      |
|           |                | Descending        | 0.3310             | 1.5898      |
| 300       | 1.3718         | Constant          | 0.1270             | 1.3777      |
|           |                | Ascending         | 0.1196             | 1.3770      |
|           |                | Descending        | 0.1559             | 1.3806      |
| summation | 1.4150         | --                | 0.2309             | 1.4337      |
